# Supplementary material for: Beyond Beer's Law: Revisiting the Lorentz‐Lorenz Equation
Source: PubMed Central journal article supplement — Chemphyschem. 2020 May 27;21(12):1218–23. doi: 10.1002/cphc.202000301 (PMC7317954; doi:10.1002/cphc.202000301), 2020-05-27
Supplement: CPHC-21-1218-s001.pdf [file CPHC-21-1218-s001.pdf]

# ChemPhysChem

## Supporting Information

### **Beyond Beer's Law: Revisiting the Lorentz-Lorenz Equation**

Thomas G. Mayerhöfer\* and Jürgen Popp© 2020 The Authors. Published by Wiley-VCH Verlag GmbH & Co. KGaA. This is an open access article under the terms of the Creative Commons Attribution Non-Commercial NoDerivs License, which permits use and distribution in any medium, provided the original work is properly cited, the use is non-commercial and no modifications or adaptations are made.

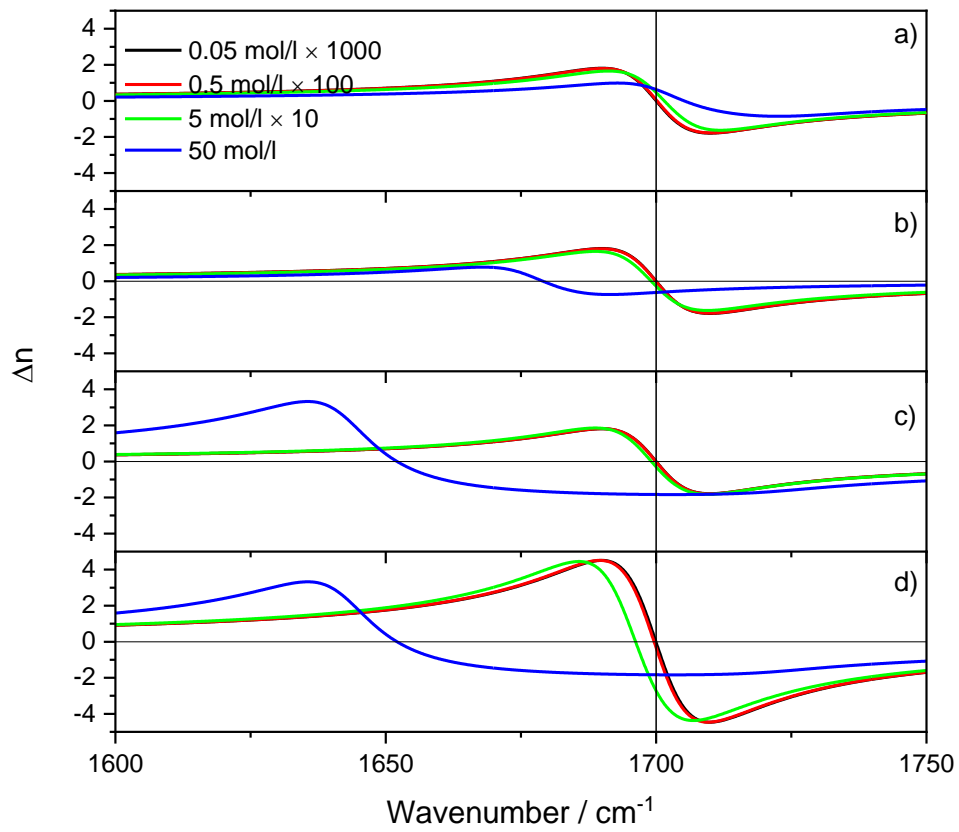

**Figure S1.** Normalized Change of the index of refraction for different concentrations of 0.05, 0.5, 5 and 50 mol/l of the hypothetical material a) conventional dispersion formula. b) conventional dispersion formula assuming a redshift according to  $\tilde{\nu}'_i = \sqrt{\tilde{\nu}_{0i}^2 - \frac{c}{3} S_i^{-2}}$ . c) Lorentz-Lorenz formula eqn. Fehler! Verweisquelle konnte nicht gefunden werden. in combination with Fehler! Verweisquelle konnte nicht gefunden werden.. d) Same as c) but with hypothetical solvent.

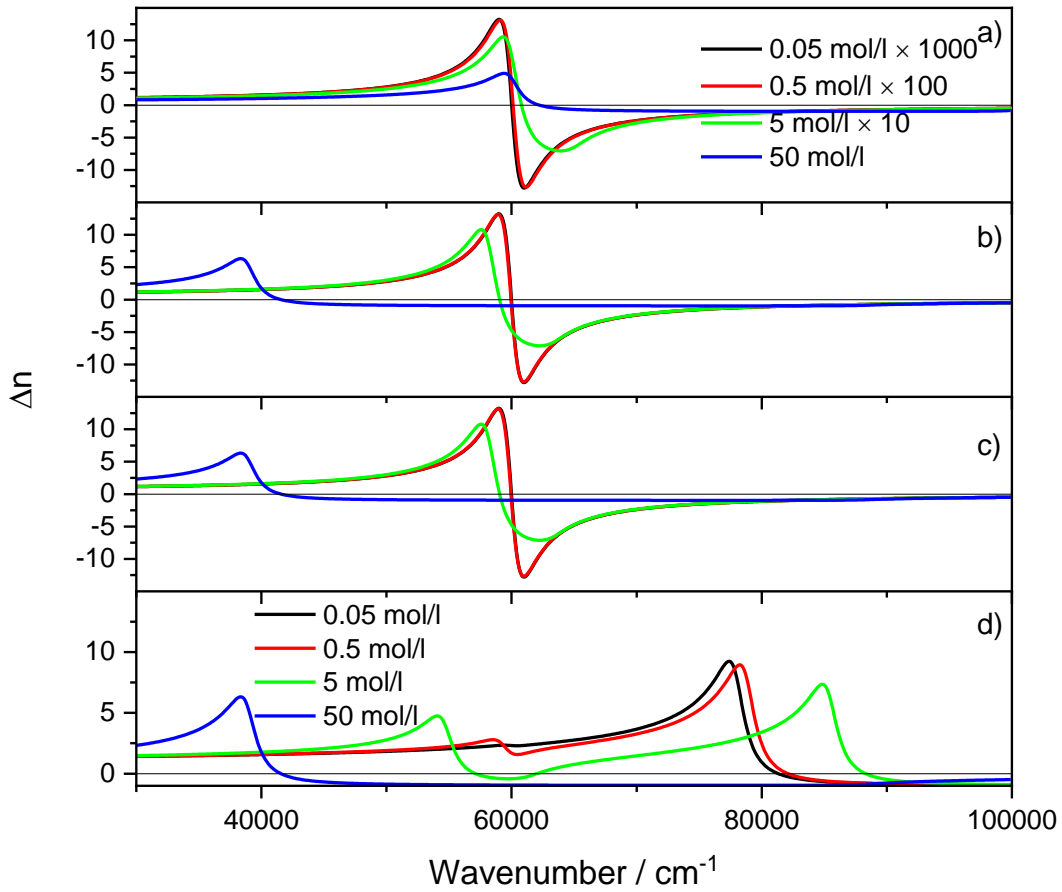

**Figure S2.** Normalized change of the index of refraction for different concentrations of 0.05, 0.5, 5 and 50 mol/l of the hypothetical material. a) conventional dispersion formula. b) conventional dispersion formula assuming a redshift according to  $\tilde{\nu}'_{0i} = \sqrt{\tilde{\nu}_{0i}^2 - \xi_i S_i^{-2}}$ . c) Lorentz-Lorenz formula eqn. **Fehler! Verweisquelle konnte nicht gefunden werden.** in combination with **Fehler! Verweisquelle konnte nicht gefunden werden.** d) Same as c) but with hypothetical solvent. Note that for d), in contrast to a) - c), a constant  $d = 10^{-6}$  cm was chosen.

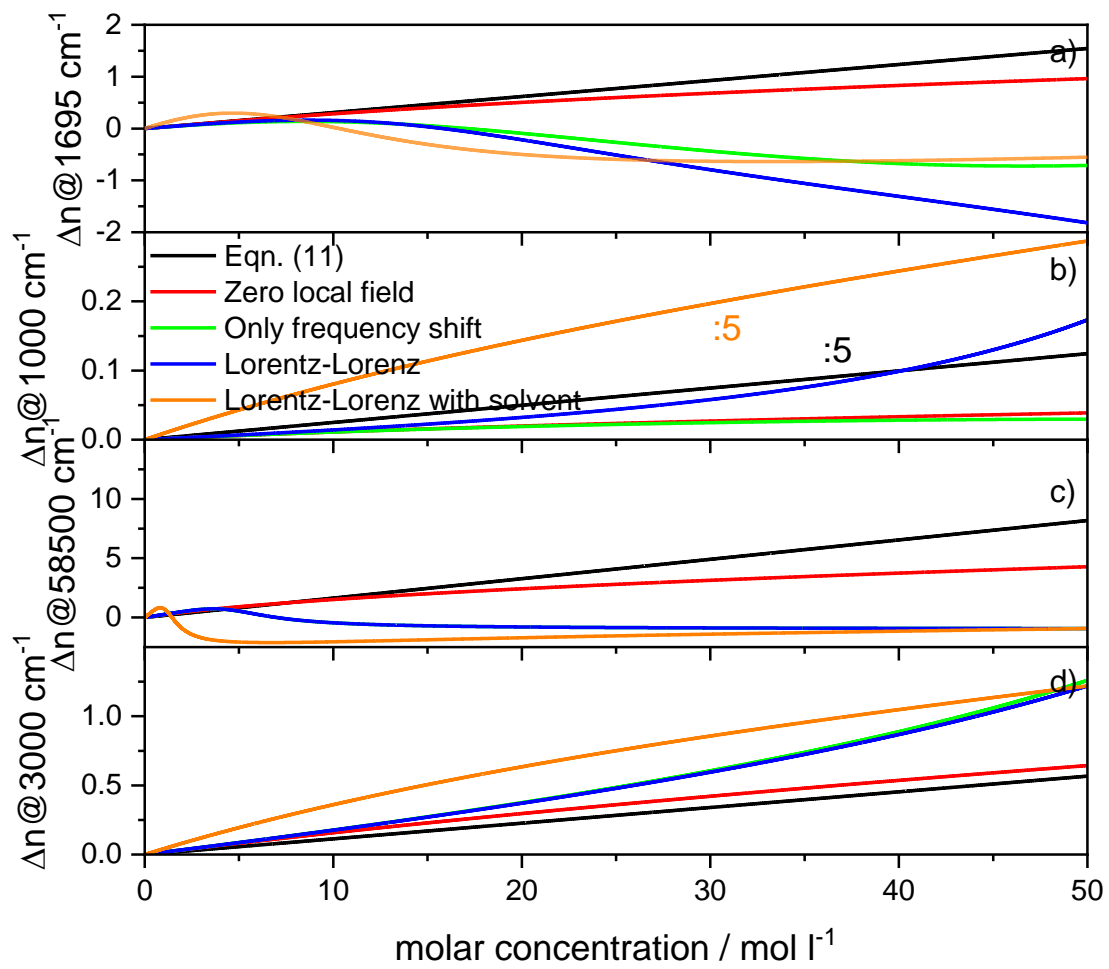

Figure S3. Dependence of the index of refraction change from the concentration. a) at 1695 cm<sup>-1</sup>. b) at 1000 cm<sup>-1</sup>. c) at 58 500 cm<sup>-1</sup>. d) at 3000 cm<sup>-1</sup>.
